# Supplementary material for: Electronic and optical properties of Janus Ga2STe bilayer: a promising candidate for excitonic solar cell
Source: Royal Society of Chemistry journal article supplement (doi:10.1039/d3tc02811a), 2023-01-01
Supplement: d3tc02811a1.pdf [file d3tc02811a1.pdf]

Supporting Information for

## Electronic and optical properties of Janus Ga<sub>2</sub>STe bilayer: A promising candidate for excitonic solar cell

Huabing Shu\* and Xiaomei Liu

School of Science, Jiangsu University of Science and Technology, Zhenjiang 212001, China

\*E-mail: shuhuabing@just.edu.cn

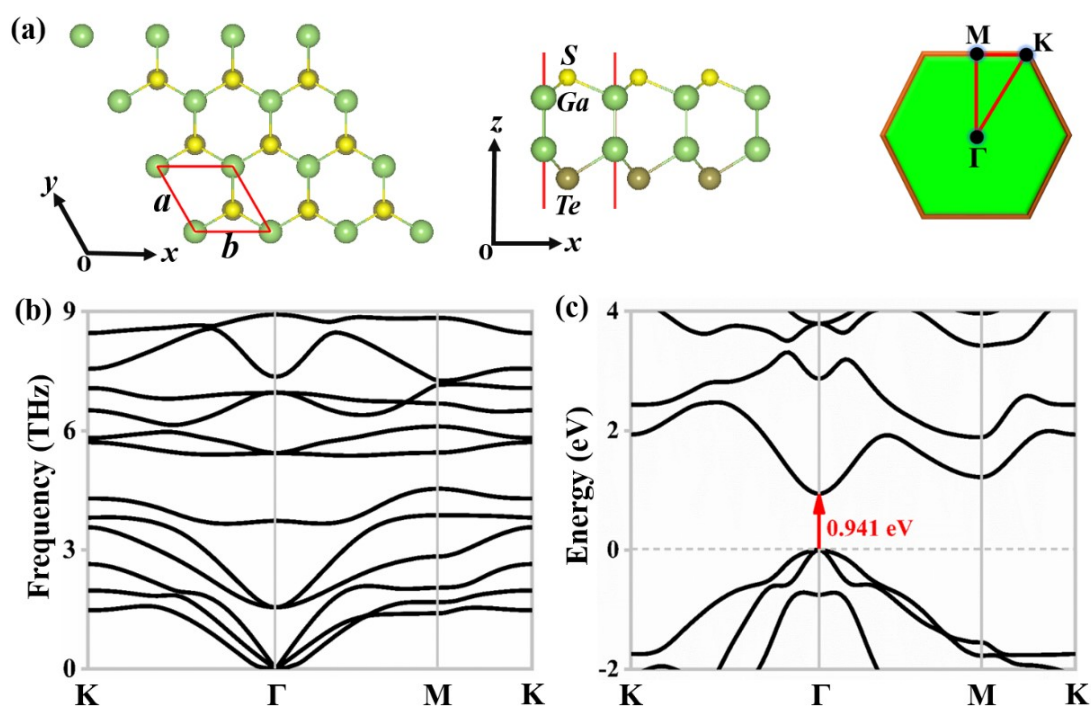

**Fig. S1** (a) Top and side views of Janus Ga<sub>2</sub>STe monolayer and high-symmetry directions of first Brillouin zone. Green, yellow, and brown spheres show the Ga, S, and Te atoms, respectively. (b)-(c) Phonon spectrum and band structure of Janus Ga<sub>2</sub>STe monolayer at DTF-PBE level.

**Table S1** The calculated lattice constant ( $a/b$ ), bond lengths ( $l_{S-Ga}$ ,  $l_{Ga-Ga}$ ,  $l_{Ga-Te}$ ), effective thickness ( $h$ ) for Ga<sub>2</sub>STe monolayer, and bandgap at PBE level. Length and energy units are Å and eV, respectively.

| Name       | $a/b$                | $l_{S-Ga}$           | $l_{Ga-Ga}$          | $l_{Ga-Te}$          | $h$                  | $E_g$                |
|------------|----------------------|----------------------|----------------------|----------------------|----------------------|----------------------|
| This work  | 3.881                | 2.438                | 2.455                | 2.628                | 4.789                | 0.941                |
| Other work | 3.899 <sup>[1]</sup> | 2.446 <sup>[1]</sup> | 2.468 <sup>[1]</sup> | 2.639 <sup>[1]</sup> | 4.802 <sup>[1]</sup> | 0.912 <sup>[1]</sup> |
|            | 3.890 <sup>[2]</sup> | 2.470 <sup>[2]</sup> | 2.450 <sup>[2]</sup> | 2.640 <sup>[2]</sup> |                      |                      |
|            | 3.901 <sup>[3]</sup> | 2.471 <sup>[3]</sup> | 2.450 <sup>[3]</sup> | 2.642 <sup>[3]</sup> |                      |                      |

**Table S2** The calculated lattice constants  $a/b$  (Å), interlayer equilibrium distance  $d_0$  (Å), binding energies  $E_b$  (meV/Å<sup>2</sup>), and bandgap  $E_g^{\text{PBE}}$  (eV) of eight high-symmetry stacking configurations for Janus Ga<sub>2</sub>STe bilayer.

| Name               | AA <sub>1</sub> | AA <sub>2</sub> | AA <sub>3</sub> | AA <sub>4</sub> | AB <sub>1</sub> | AB <sub>2</sub> | AB <sub>3</sub> | AB <sub>4</sub> |
|--------------------|-----------------|-----------------|-----------------|-----------------|-----------------|-----------------|-----------------|-----------------|
| $a/b$              | 3.923           | 3.926           | 3.922           | 3.923           | 3.927           | 3.923           | 3.923           | 3.926           |
| $d_0$              | 3.983           | 3.736           | 3.937           | 4.055           | 3.704           | 3.990           | 3.879           | 3.424           |
| $E_b$              | -13.77          | -14.40          | -14.07          | -13.15          | -14.66          | -13.76          | -14.22          | -14.76          |
| $E_g^{\text{PBE}}$ | 0.533           | 0.563           | 1.070           | 0.979           | 0.562           | 0.532           | 0.977           | 1.066           |

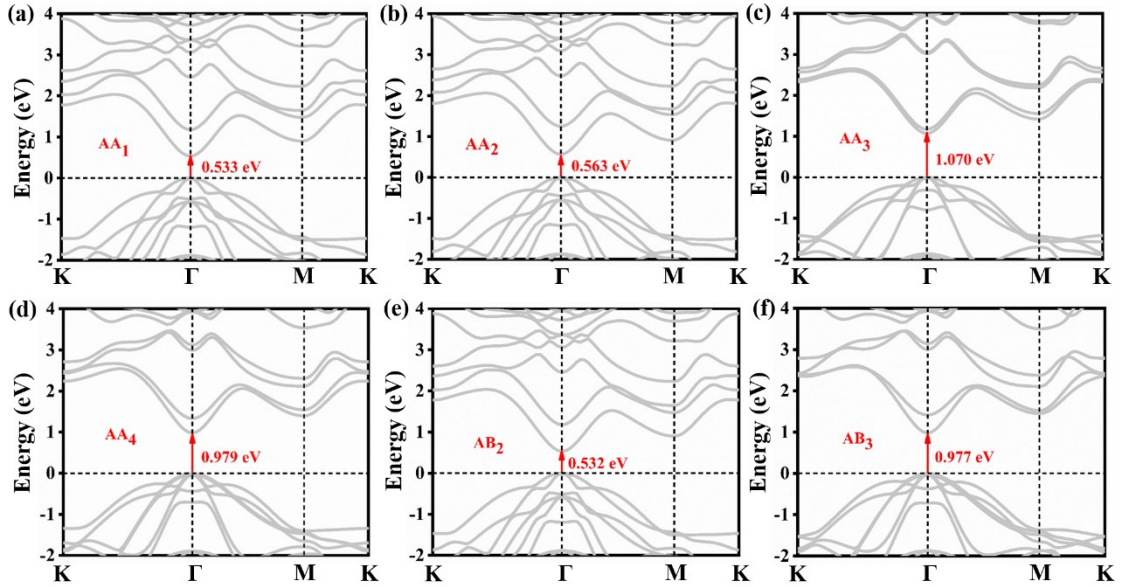

**Fig. S2** Band structures of Ga<sub>2</sub>STe bilayers with different stacking configurations at the

DFT-PBE level: (a) AA<sub>1</sub>, (b) AA<sub>2</sub>, (c) AA<sub>3</sub>, (d) AA<sub>4</sub>, (e) AB<sub>2</sub>, (f) AB<sub>3</sub>.

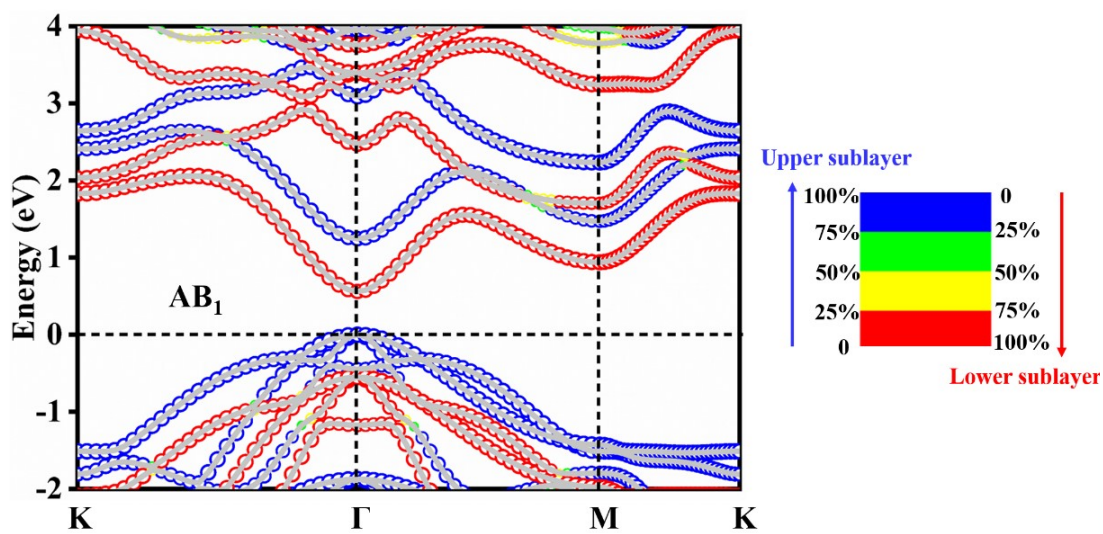

Fig. S3 Projected band structure of Ga<sub>2</sub>STe bilayer with AB<sub>1</sub> stacking configuration.

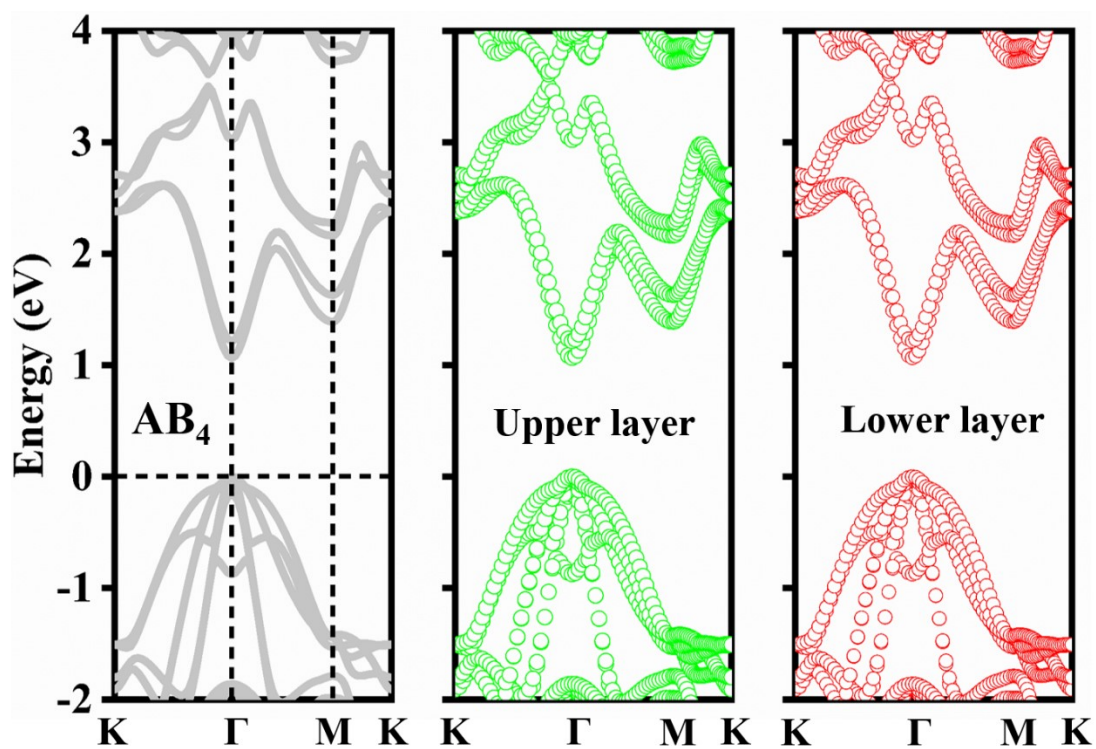

Fig. S4 Band structure of Ga<sub>2</sub>STe bilayer with AB<sub>4</sub> stacking configuration and the contribution of constituent layer. The contribution of constituent layer to every energy band is equivalent.

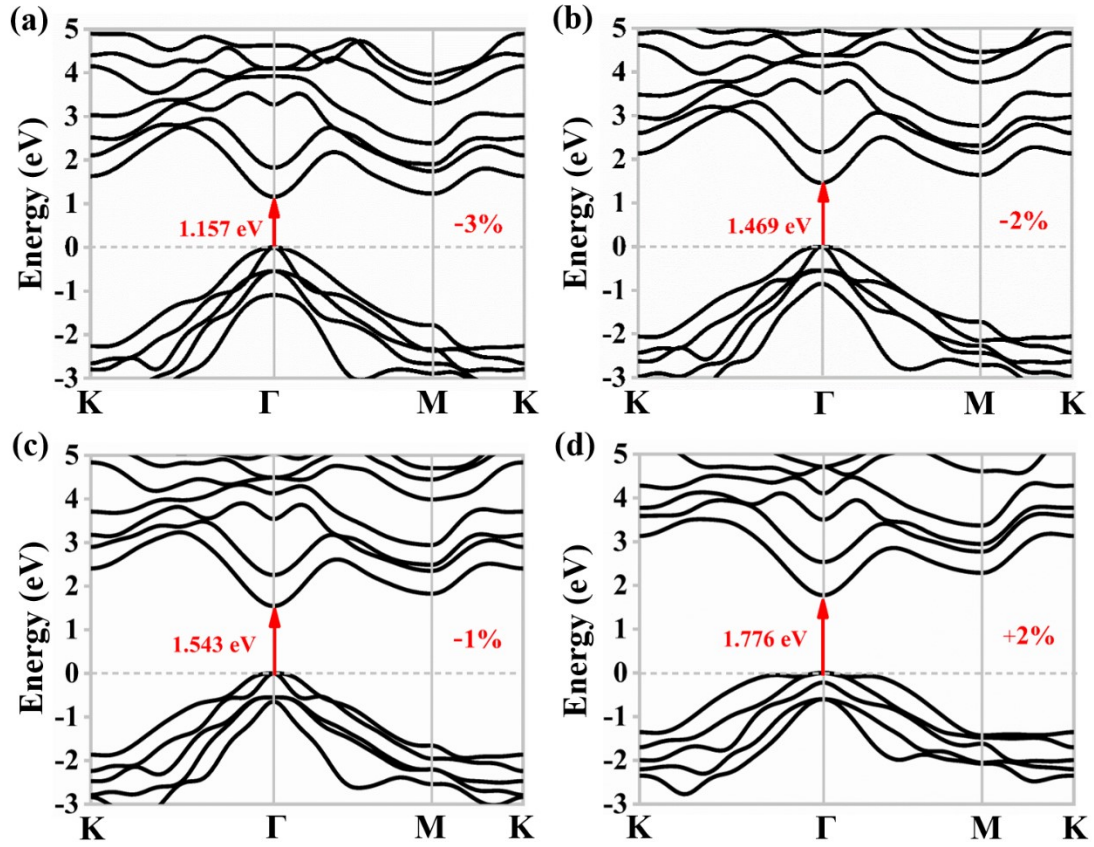

Fig. S5 Quasi-particle band structures of  $\text{Ga}_2\text{STe}$  bilayers with  $\text{AB}_1$  configuration at  $G_0W_0$  level under different biaxial strains: (a)  $-3\%$ , (b)  $-2\%$ , (c)  $-1\%$ , (d)  $+2\%$ .

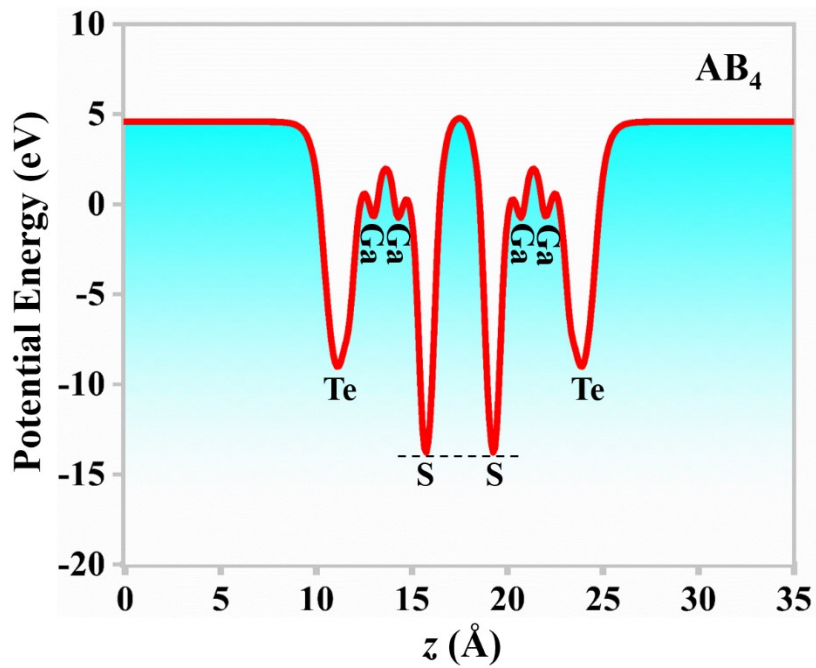

Fig. S6 Plane averaged electrostatic potential profiles across the interface of the  $\text{AB}_4$

Ga<sub>2</sub>STe bilayer.

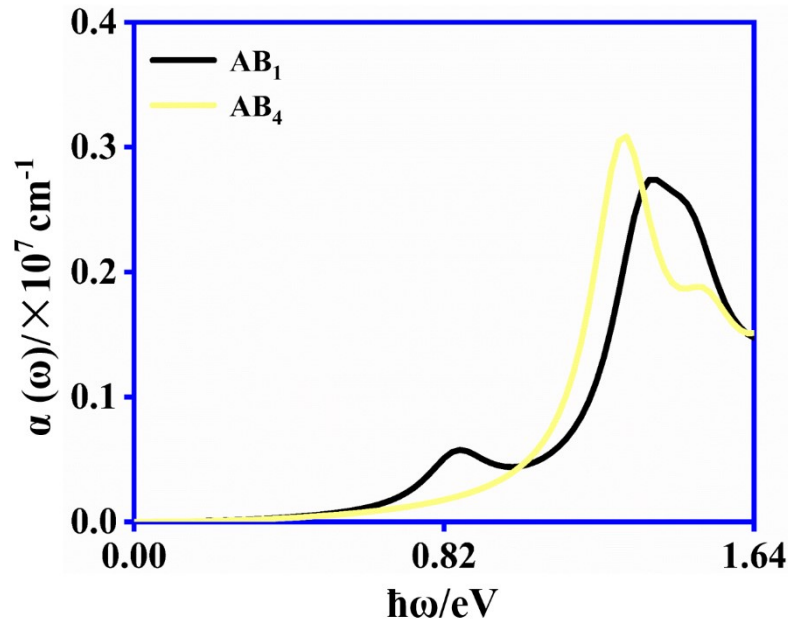

**Fig. S7** Light absorption coefficient  $\alpha(\omega)$  of Ga<sub>2</sub>STe bilayers with AB<sub>1</sub> and AB<sub>4</sub> configurations as a function of photon energy ( $\hbar\omega$ ).

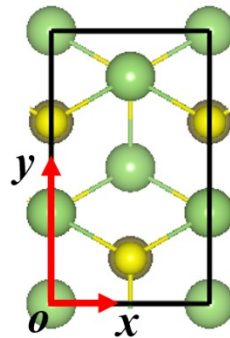

**Fig. S8** An orthogonal supercell of Ga<sub>2</sub>STe bilayer with AB<sub>1</sub> configuration.

## References

- 1 H. T. T. Nguyen, V. T. T. Vi, T. V. Vu, H. V. Phuc, C. V. Nguyen, H. D. Tong, L. T. Hoa and N. N. Hieu, *Phys. E Low-Dimens. Syst. Nanostructures*, 2020, **124**, 114358
- 2 A. Huang, W. Shi and Z. Wang, *J. Phys. Chem. C*, 2019, **123**, 11388–11396.
- 3 Y. Bai, Q. Zhang, N. Xu, K. Deng and E. Kan, *Appl. Surf. Sci.*, 2019, **478**, 522–531.
